# Supplementary material for: Self-interaction error in DFT-based modelling of ionic liquids
Source: Royal Society of Chemistry journal article supplement (doi:10.1039/c5cp05922d), 2015-11-30
Supplement: c5cp05922d1.pdf [file c5cp05922d1.pdf]

# ELECTRONIC SUPPLEMENTARY INFORMATION:

## Self-interaction error in DFT-based modelling of ionic liquids

Isabel Lage-Estebanez,<sup>a</sup> Anton Ruzanov,<sup>b</sup> José M. García de la Vega,<sup>\*a</sup>  
Maxim V. Fedorov<sup>c</sup> and Vladislav B. Ivaništšev<sup>b</sup>

---

<sup>a</sup> *Departamento de Química Física Aplicada, Universidad Autónoma de Madrid, 28049, Madrid, Spain.*

<sup>b</sup> *Institute of Chemistry, University of Tartu, Ravila 14a, Tartu 50411, Estonia*

<sup>c</sup> *Department of Physics, Scottish Universities Physics Alliance (SUPA), Strathclyde University, John Anderson Building, 107 Rottenrow East, Glasgow G4 0NG, UK.*

\* Email: [garcia.delavega@uam.es](mailto:garcia.delavega@uam.es)

Table S 1: Dependence of interaction energy ( $\text{kJ mol}^{-1}$ ) on the basis set. Calculations were performed using revPBE density functional with the Grimme’s dispersion correction and without BSSE correction

| Ionic Pair                   | DZ      | DZP     | TZP     | TZ2P    | QZ4P    |
|------------------------------|---------|---------|---------|---------|---------|
| [BMIm]Cl                     | -418.02 | -425.89 | -407.02 | -408.23 | -396.18 |
| [BMIm]I                      | -378.74 | -381.75 | -373.30 | -379.66 | -361.54 |
| [BMIm]SCN                    | -363.63 | -374.01 | -366.69 | -366.02 | -365.51 |
| [BMIm][BF <sub>4</sub> ]     | -353.80 | -370.58 | -362.25 | -361.00 | -359.82 |
| [BMIm][N(CN) <sub>2</sub> ]  | -355.68 | -364.59 | -356.85 | -355.93 | -355.81 |
| [BMIm][PF <sub>6</sub> ]     | -325.31 | -349.41 | -343.00 | -341.41 | -341.79 |
| [BMIm][TFSI]                 | -379.74 | -352.13 | -340.12 | -340.33 | -339.62 |
| [BMIm][FEP]                  | -312.25 | -320.20 | -310.66 | -304.18 | -312.54 |
| [BPy]Cl                      | -434.97 | -441.87 | -415.51 | -416.89 | -403.38 |
| [BPy]I                       | -389.78 | -392.92 | -377.40 | -383.63 | -366.02 |
| [BPy]SCN                     | -385.35 | -387.27 | -367.65 | -368.11 | -367.10 |
| [BPy][BF <sub>4</sub> ]      | -358.07 | -365.26 | -349.91 | -349.91 | -350.24 |
| [BPy][N(CN) <sub>2</sub> ]   | -366.64 | -373.30 | -359.95 | -359.57 | -359.36 |
| [BPy][PF <sub>6</sub> ]      | -325.26 | -337.15 | -326.06 | -326.14 | -327.82 |
| [BPy][TFSI]                  | -368.48 | -347.98 | -334.68 | -335.14 | -334.22 |
| [BPy][FEP]                   | -297.90 | -296.81 | -275.01 | -304.05 | -277.52 |
| [BMPyr]Cl                    | -402.12 | -411.75 | -397.31 | -397.69 | -387.19 |
| [BMPyr]I                     | -359.03 | -362.25 | -360.41 | -366.31 | -349.57 |
| [BMPyr]SCN                   | -355.64 | -365.18 | -358.65 | -358.19 | -358.02 |
| [BMPyr][BF <sub>4</sub> ]    | -347.65 | -364.18 | -358.15 | -358.82 | -355.68 |
| [BMPyr][N(CN) <sub>2</sub> ] | -347.48 | -356.77 | -352.08 | -351.08 | -351.20 |
| [BMPyr][PF <sub>6</sub> ]    | -314.89 | -336.02 | -331.83 | -330.54 | -331.04 |
| [BMPyr][TFSI]                | -353.80 | -370.58 | -362.25 | -361.00 | -359.82 |
| [BMPyr][FEP]                 | -267.99 | -281.54 | -273.30 | -272.59 | -275.39 |

Table S 2: Basis set superposition error ( $\text{kJ mol}^{-1}$ ) dependence on the basis set. Calculations were performed using revPBE density functional with the Grimme’s dispersion correction and according to the counterpoise method

| Ionic Pair                   | DZ     | DZP    | TZP    | TZ2P   | QZ4P  |
|------------------------------|--------|--------|--------|--------|-------|
| [BMIm]Cl                     | -15.40 | -14.90 | -9.58  | -9.62  | -3.05 |
| [BMIm]I                      | -14.35 | -14.39 | -14.23 | -10.92 | -0.75 |
| [BMIm]SCN                    | -11.84 | -7.95  | -3.10  | -2.93  | -2.18 |
| [BMIm][BF <sub>4</sub> ]     | -6.49  | -6.95  | -5.06  | -3.97  | -2.68 |
| [BMIm][N(CN) <sub>2</sub> ]  | -19.12 | -12.59 | -3.85  | -3.56  | -2.18 |
| [BMIm][PF <sub>6</sub> ]     | -7.03  | -5.56  | -2.89  | -1.88  | -1.51 |
| [BMIm][TFSI]                 | -43.47 | -14.27 | -5.44  | -4.60  | -2.43 |
| [BMIm][FEP]                  | -18.66 | -9.50  | -4.73  | -3.56  | -4.60 |
| [BPy]Cl                      | -35.90 | -30.67 | -15.94 | -15.86 | -4.69 |
| [BPy]I                       | -13.43 | -14.85 | -13.68 | -16.61 | -0.84 |
| [BPy]SCN                     | -19.87 | -14.48 | -3.56  | -3.26  | -2.26 |
| [BPy][BF <sub>4</sub> ]      | -17.82 | -15.27 | -4.94  | -3.93  | -2.09 |
| [BPy][N(CN) <sub>2</sub> ]   | -27.45 | -18.79 | -4.69  | -4.31  | -2.18 |
| [BPy][PF <sub>6</sub> ]      | -40.21 | -24.52 | -6.53  | -4.02  | -2.30 |
| [BPy][TFSI]                  | -32.64 | -14.23 | -3.68  | -3.10  | -1.80 |
| [BPy][FEP]                   | -26.07 | -17.07 | -4.48  | -3.56  | -2.59 |
| [BMPyr]Cl                    | -19.71 | -20.84 | -13.68 | -13.77 | -4.06 |
| [BMPyr]I                     | -12.05 | -11.97 | -13.72 | -16.86 | -1.00 |
| [BMPyr]SCN                   | -12.93 | -8.41  | -2.59  | -2.38  | -1.76 |
| [BMPyr][BF <sub>4</sub> ]    | -7.70  | -6.90  | -4.81  | -3.93  | -2.68 |
| [BMPyr][N(CN) <sub>2</sub> ] | -16.48 | -10.42 | -3.43  | -3.14  | -1.84 |
| [BMPyr][PF <sub>6</sub> ]    | -6.82  | -4.44  | -2.51  | -1.63  | -1.00 |
| [BMPyr][TFSI]                | -40.79 | -10.84 | -4.77  | -4.02  | -1.88 |
| [BMPyr][FEP]                 | -16.15 | -7.61  | -4.48  | -3.60  | -3.72 |

Table S 3: Dependence of dipole moment (D) on the basis set. Calculations were performed using revPBE density functional in comparison to the MP2/6-311+G(3df) result

| Ionic Pair                   | DZ   | DZP  | TZP  | TZ2P | QZ4P | MP2  |
|------------------------------|------|------|------|------|------|------|
| [BMIm]Cl                     | 7.7  | 8.1  | 7.4  | 8.1  | 8.1  | 9.2  |
| [BMIm]SCN                    | 13.1 | 12.5 | 12.4 | 12.4 | 12.1 | 12.7 |
| [BMIm][N(CN) <sub>2</sub> ]  | 11.6 | 10.9 | 10.7 | 10.7 | 10.5 | 10.8 |
| [BMIm][BF <sub>4</sub> ]     | 13.4 | 12.7 | 12.9 | 12.9 | 12.7 | 13.0 |
| [BMIm][PF <sub>6</sub> ]     | 15.2 | 14.3 | 14.5 | 14.5 | 14.2 | 14.5 |
| [BMIm][TFSI]                 | 12.1 | 11.5 | 11.6 | 11.6 | 11.3 | 11.5 |
| [BMIm][FEP]                  | 15.5 | 15.2 | 15.3 | 15.6 | 15.1 | 15.6 |
| [BPy]Cl                      | 6.7  | 6.4  | 6.7  | 6.7  | 7.0  | 8.2  |
| [BPy]SCN                     | 10.2 | 9.9  | 10.1 | 10.1 | 10.2 | 11.9 |
| [BPy][N(CN) <sub>2</sub> ]   | 10.6 | 9.9  | 10.0 | 10.0 | 9.7  | 10.9 |
| [BPy][BF <sub>4</sub> ]      | 13.1 | 12.3 | 12.7 | 12.7 | 12.3 | 12.6 |
| [BPy][PF <sub>6</sub> ]      | 15.2 | 14.4 | 14.6 | 14.6 | 14.2 | 14.5 |
| [BPy][TFSI]                  | 13.6 | 13.0 | 13.3 | 13.2 | 12.7 | 13.1 |
| [BPy][FEP]                   | 14.9 | 14.8 | 15.1 | 15.3 | 14.6 | 15.4 |
| [BMPyr]Cl                    | 13.0 | 12.4 | 12.6 | 12.6 | 12.6 | 13.8 |
| [BMPyr]SCN                   | 14.2 | 13.5 | 13.4 | 13.4 | 13.1 | 13.4 |
| [BMPyr][N(CN) <sub>2</sub> ] | 13.5 | 12.7 | 12.3 | 12.3 | 12.0 | 12.8 |
| [BMPyr][BF <sub>4</sub> ]    | 14.9 | 14.1 | 14.2 | 14.3 | 14.1 | 14.6 |
| [BMPyr][PF <sub>6</sub> ]    | 17.1 | 16.2 | 16.2 | 16.2 | 16.0 | 16.5 |
| [BMPyr][TFSI]                | 15.2 | 14.6 | 14.7 | 15.2 | 14.4 | 15.2 |
| [BMPyr][FEP]                 | 18.1 | 17.8 | 17.8 | 17.8 | 17.6 | 18.3 |

Table S 4: BSSE corrected interaction energy ( $\text{kJ mol}^{-1}$ ) calculated with TZ2P and ATZ2P basis sets at revPBE level in comparison to the BSSE corrected MP2/6-311+G(3df) result

| Ionic Pair                   | revPBE+DB/ATZ2P | revPBE+DB/TZ2P | MP2     |
|------------------------------|-----------------|----------------|---------|
| [BIm]Cl                      | -396.60         | -398.61        | -378.23 |
| [BIm]SCN                     | -378.78         | -363.09        | -366.82 |
| [BIm][N(CN) <sub>2</sub> ]   | -354.22         | -357.02        | -366.87 |
| [BIm][BF <sub>4</sub> ]      | -355.85         | -352.38        | -365.23 |
| [BIm][PF <sub>6</sub> ]      | -349.95         | -339.53        | -347.25 |
| [BIm][TFSI]                  | -354.93         | -335.72        | -363.44 |
| [BIm][FEP]                   | -313.55         | -300.62        | -349.75 |
| [BPy]Cl                      | -399.15         | -401.04        | -371.77 |
| [BPy]SCN                     | -363.25         | -364.84        | -348.67 |
| [BPy][N(CN) <sub>2</sub> ]   | -344.18         | -345.97        | -349.72 |
| [BPy][BF <sub>4</sub> ]      | -355.18         | -355.26        | -343.35 |
| [BPy][PF <sub>6</sub> ]      | -323.34         | -322.13        | -325.56 |
| [BPy][TFSI]                  | -329.20         | -332.04        | -330.87 |
| [BPy][FEP]                   | -298.82         | -300.49        | -326.78 |
| [BMPyr]Cl                    | -386.52         | -383.92        | -375.99 |
| [BMPyr]SCN                   | -375.60         | -355.81        | -353.02 |
| [BMPyr][N(CN) <sub>2</sub> ] | -349.82         | -354.89        | -350.22 |
| [BMPyr][BF <sub>4</sub> ]    | -355.51         | -347.94        | -347.49 |
| [BMPyr][PF <sub>6</sub> ]    | -343.21         | -328.90        | -321.83 |
| [BMPyr][TFSI]                | -338.23         | -314.43        | -310.35 |
| [BMPyr][FEP]                 | -279.45         | -268.99        | -284.14 |

Table S 5: Dipole moment (D) calculated with TZ2P and ATZ2P basis sets at revPBE level in comparison to the MP2/6-311+G(3df) result

| Ionic Pair                   | revPBE+DB/ATZ2P | revPBE+DB/TZ2P | MP2  |
|------------------------------|-----------------|----------------|------|
| [BMIm]Cl                     | 8.2             | 8.1            | 9.2  |
| [BMIm]SCN                    | 12.3            | 12.4           | 12.7 |
| [BMIm][N(CN) <sub>2</sub> ]  | 10.5            | 10.7           | 10.8 |
| [BMIm][BF <sub>4</sub> ]     | 13.0            | 12.9           | 13.0 |
| [BMIm][PF <sub>6</sub> ]     | 14.6            | 14.5           | 14.5 |
| [BMIm][TFSI]                 | 11.9            | 11.6           | 11.5 |
| [BMIm][FEP]                  | 15.6            | 15.6           | 15.6 |
| [BPy]Cl                      | 6.8             | 6.7            | 8.2  |
| [BPy]SCN                     | 10.2            | 10.2           | 11.9 |
| [BPy][N(CN) <sub>2</sub> ]   | 9.6             | 10.0           | 10.9 |
| [BPy][BF <sub>4</sub> ]      | 12.5            | 12.7           | 12.6 |
| [BPy][PF <sub>6</sub> ]      | 14.5            | 14.6           | 14.5 |
| [BPy][TFSI]                  | 13.2            | 13.2           | 13.1 |
| [BPy][FEP]                   | 15.2            | 15.3           | 15.4 |
| [BMPyr]SCN                   | 13.1            | 13.4           | 13.8 |
| [BMPyr]Cl                    | 12.7            | 12.6           | 13.4 |
| [BMPyr][N(CN) <sub>2</sub> ] | 12.1            | 12.3           | 12.8 |
| [BMPyr][BF <sub>4</sub> ]    | 14.2            | 14.3           | 14.6 |
| [BMPyr][PF <sub>6</sub> ]    | 16.2            | 16.6           | 16.5 |
| [BMPyr][TFSI]                | 15.2            | 15.2           | 15.2 |
| [BMPyr][FEP]                 | 18.2            | 17.8           | 18.3 |

Table S 6: Interaction energy ( $\text{kJ mol}^{-1}$ ) calculated at revPBE/TZ2P level including full Perdew–Zunger (PZ) and scaled Perdew–Zunger (sPZ) corrections in comparison to the BSSE corrected MP2/6-311+G(3df) result

| Ionic Pair                   | revPBE+PZ | revPBE+sPZ | MP2     |
|------------------------------|-----------|------------|---------|
| [BMIm]Cl                     | -247.79   | -368.45    | -378.23 |
| [BMIm]I                      | -188.36   | -332.66    | -324.63 |
| [BMIm]SCN                    | -304.65   | -351.40    | -348.52 |
| [BMIm][BF <sub>4</sub> ]     | -347.31   | -355.08    | -354.63 |
| [BMIm][N(CN) <sub>2</sub> ]  | -331.54   | -348.21    | -355.14 |
| [BMIm][PF <sub>6</sub> ]     | -326.85   | -337.00    | -340.68 |
| [BMIm][TFSI]                 | -295.97   | -327.77    | -336.82 |
| [BMIm][FEP]                  | -324.07   | -305.31    | -331.84 |
| [BPy]Cl                      | -206.37   | -362.10    | -371.77 |
| [BPy]I                       | -154.67   | -324.55    | -316.74 |
| [BPy]SCN                     | -301.08   | -352.09    | -348.67 |
| [BPy][BF <sub>4</sub> ]      | -337.60   | -344.30    | -349.72 |
| [BPy][N(CN) <sub>2</sub> ]   | -324.79   | -349.17    | -353.03 |
| [BPy][PF <sub>6</sub> ]      | -303.60   | -318.42    | -325.56 |
| [BPy][TFSI]                  | -370.33   | -339.70    | -330.87 |
| [BPy][FEP]                   | -321.43   | -304.68    | -326.78 |
| [BMPyr]Cl                    | -232.76   | -353.69    | -375.99 |
| [BMPyr]I                     | -209.80   | -321.52    | -326.97 |
| [BMPyr]SCN                   | -335.23   | -351.69    | -353.02 |
| [BMPyr][BF <sub>4</sub> ]    | -293.08   | -342.52    | -350.22 |
| [BMPyr][N(CN) <sub>2</sub> ] | -322.98   | -342.95    | -347.49 |
| [BMPyr][PF <sub>6</sub> ]    | -307.90   | -324.70    | -321.83 |
| [BMPyr][TFSI]                | -321.32   | -315.81    | -310.35 |
| [BMPyr][FEP]                 | -263.45   | -267.88    | -283.28 |
